# Supplementary material for: Electron Density Modification of Single Wall Carbon Nanotubes (SWCNT) by Liquid-Phase Molecular Adsorption of Hexaiodobenzene
Source: MDPI journal article supplement (doi:10.3390/ma6020535), 2013-02-15
Supplement: s1 [file s1]

## Supporting Information

**Figure S1.** TEM image of as-prepared HIB-adsorbed SWCNT. An illustration of HIB molecule with the diameter assumes that HIB molecules are distributed inside the tubes as shown in Figure S1-E.

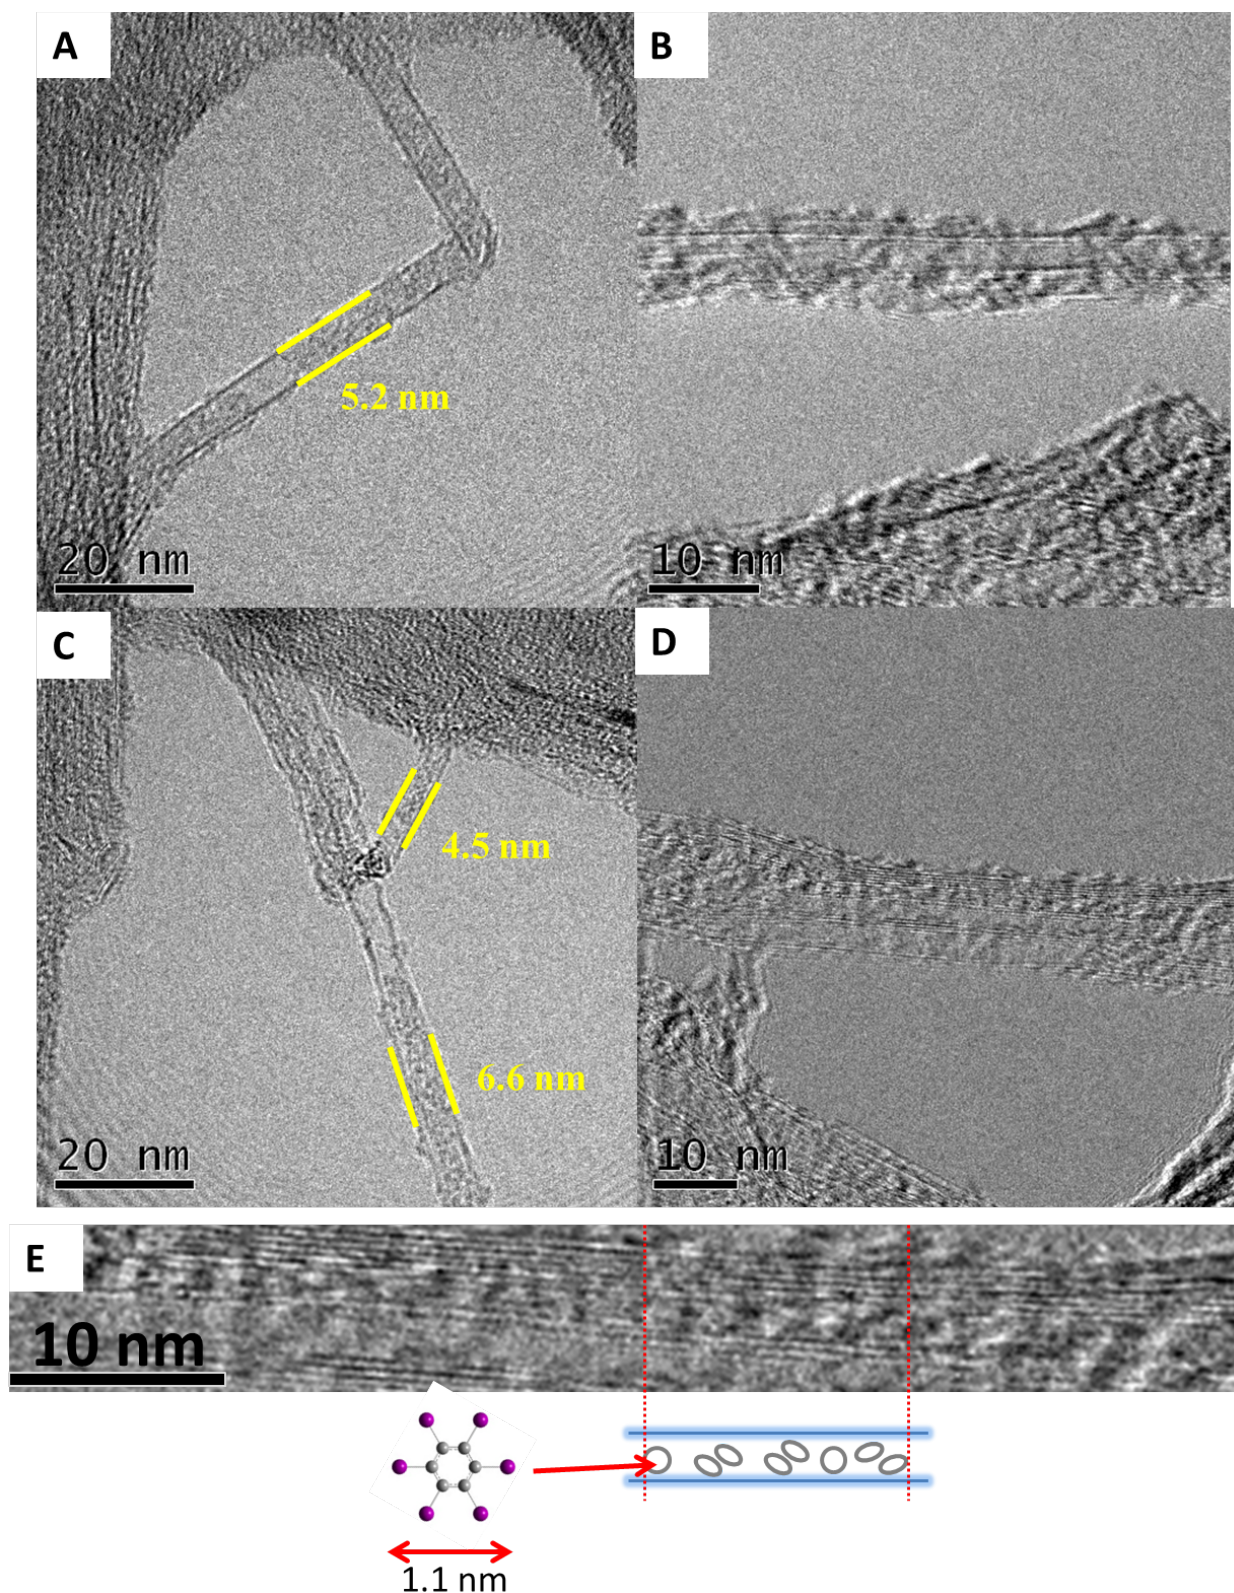

**Table S1.** The multi-peak fitting parameters of XPS C1s spectra

| Sample              | Position (eV) | Area   | FWHM (eV) |
|---------------------|---------------|--------|-----------|
| SWCNT               | 284.1         | 691.4  | 0.95      |
|                     | 284.8         | 212.6  | 1.59      |
|                     | 285.9         | 85.5   | 1.56      |
|                     | 287.1         | 58.5   | 1.88      |
|                     | 289.4         | 53.0   | 2.62      |
|                     | 290.9         | 69.8   | 2.37      |
| HIB@SWCNT- <i>h</i> | 283.8         | 1147.8 | 0.99      |
|                     | 284.7         | 246.8  | 1.38      |
|                     | 285.9         | 128.4  | 1.50      |
|                     | 287.1         | 67.9   | 1.65      |
|                     | 289.1         | 80.7   | 2.12      |
|                     | 290.7         | 29.7   | 1.76      |

© 2013 by the authors; licensee MDPI, Basel, Switzerland. This article is an open access article distributed under the terms and conditions of the Creative Commons Attribution license (<http://creativecommons.org/licenses/by/3.0/>).
